# Supplementary material
Source: Research Square preprint supplement (doi:10.21203/rs.3.rs-9988886/v1)
Supplement: Supplementary file 1 [file 2457af026c63cc790599c749.docx]

Supplementary information for

**Patient-Facing AI Chatbots vs Primary Care Physicians:**

**A Standardized Patient Field Experiment in China**

Table of Contents

[Supplementary 1. SP scripts 2](#_Toc226542290)

[Supplementary 2. Checklist, diagnosis and treatment 13](#_Toc226542291)

[Figure S1. The distribution of each specific item in the angina and asthma checklist 16](#_Toc226542292)

[Table S1. Sensitivity analysis for diagnostic accuracy 17](#_Toc226542293)

[Table S2. Sensitivity Analysis of Reversing the Order of Physician and AI Consultations 18](#_Toc226542294)

[Table S3. Comparison of PHC physicians in Henan province and China nationwide 19](#_Toc226542295)

[Supplement 3. An example of AI medial consultation 20](#_Toc226542296)

# Supplementary 1. SP scripts

| *Panel A Script for asthma* |
| --- |
| Name, gender, age, staff  Reason for visit: wheezing, cough  State of consultation: a little sluggish, a little tired, dry cough occasionally  Main complaint: intermittent wheezing and coughing for 2 years, recurrence in the last week, worsening  **History of present illness**  1. Name, gender, age, on November 15, 19xx, lived in XXXX Street, XXXX District, and his phone number was XXXXXXXXXXX.  2. 2 years ago, I had a fever and cough after catching a cold. I still coughed after the fever subsided, but there was no sputum. At the same time, I felt wheezing. I had a "squeaking" sound and felt suffocated. No palpitation and other discomforts. It happened once in about 3 or 4 months, but after a 15-minute break, it relieved slowly, so I haven't seen it in the CHC or taken medicine.  3. The disease seems to be related to the cold air. It is usually severe in autumn. Sometimes I feel uncomfortable when I enter an air-conditioned room. I usually cough first, and soon start to pant.  4. The weather has suddenly become cold in the past week. After the cold, I have coughing and wheezing. It is light during the day and heavy at night. Basically, I don’t have enough breath every day, and I feel a little wheezing on the second floor. Intermittent wheezing, a little cough, no fever, no sputum, no palpitation, no leg swelling, no chest pain, no hemoptysis. It takes about 15 minutes for each attack to be particularly uncomfortable, and it takes about 2 hours before and after it to completely heal, and I feel that my whole body is weak.  5. In the past 2 years, I feel that my physical strength is not as good as before, and I feel short of breath after playing a long time. Eating is ok. There is no change in weight. There is no problem with urine.  **Past history**  I started to change allergic rhinitis 7.5 years ago, sneezing, runny nose during the attack, and taking "Chlorpheniramine" in severe cases can be cured. No other diseases, no history of drug allergy. No surgical trauma. No smoking and alcohol addiction.  **Personal history and family history**  6. Born locally and went to school until graduation. Unmarried, my mother has allergic rhinitis, which is more serious than me, and sometimes she has to spray "hormones" into her nose. Father is healthy. |

| **哮喘**  **Asthma** | | | |
| --- | --- | --- | --- |
| **问题**  **Question** | | **医生是否问了以下问题1=是（跳到下一行）2=否**  **Did the doctor ask the following questions?**  **1 = Yes (Proceed to the next line) 2 = No** | **如果没有，你是否告诉了医生这一问题的答案中提供的信息（1=是 2=否）If not, did you provide the information from the answer to this question to the doctor?**  **(1 = Yes, 2 = No)** |
| 现病史  Current Medical History | | | |
| 1. | 怎么不舒服？  What is bothering you? |  |  |
| 2. | 间断性的还是持续性发作？  Is it intermittent or continuous? |  |  |
| 3. | 从什么时候开始的？  When did it start? |  |  |
| 4. | 有什么原因吗？  Is there any specific reason for it? |  |  |
| 5. | 具体是怎么样的气不够用？  Could you describe how you feel when you're short of breath in more detail? |  |  |
| 6. | 咳嗽厉害还是喘的厉害？  Is the cough severe or the wheezing more severe? |  |  |
| 7. | 怎么个喘法？  How do you experience the wheezing? |  |  |
| 8. | 白天能喘到什么程度？  How bad does it get during the day? |  |  |
| 9. | 最近1周每次发作持续了多久？  How long has each episode lasted over the past week? |  |  |
| 10. | 除了咳嗽和气喘还有别的症状吗？  Do you have any other symptoms besides wheezing? |  |  |
| 11. | 你以前去医院看过没？  Have you been to the hospital before? |  |  |
| 12. | 自己用药了吗？  Have you used any medication on your own? |  |  |
| 13. | 咳嗽有没有痰？  Is there any phlegm when you cough? |  |  |
| 14. | 你发烧吗？  Are you running a fever? |  |  |
| 15. | 你胸痛吗？  Are you experiencing chest pain? |  |  |
| 16. | 你咯血吗？  Are you coughing up blood? |  |  |
| 18. | 你有没有喉咙痛或者上呼吸道感染的症状吗（感冒，打喷嚏，鼻子阻塞）？  Do you have a sore throat or symptoms of an upper respiratory infection (such as a cold, sneezing, or nasal congestion)? |  |  |
| 19. | 最早是从什么时候开始喘的？  When did the wheezing first start? |  |  |
| 20. | 它多久发作一次（犯一次病）？  How often does it happen (how often do you have an episode)? |  |  |
| 21. | 一般在什么情况下发作？  Under what circumstances does it usually occur? |  |  |
| 22. | 每次发作程度严重吗？  Is the severity the same every time it happens? |  |  |
| 23. | 一次发作持续多久（以前）？  How long did each episode last (in the past)? |  |  |
| 24. | 你体重减轻（变瘦）了吗？  Have you lost weight? |  |  |
| 25. | 这段时间，饮食有什么变化吗？  Have there been any changes in your diet recently? |  |  |
| 26. | 这段时间，睡眠有什么变化吗？  Have you noticed any changes in your sleep lately? |  |  |
| 27. | 这两年感觉体力怎么样？  How has your physical stamina been in the last two years? |  |  |
| 系统回顾  System Review | | | |
| 28. | 其它还有什么地方不舒服？  Is there anywhere else that's bothering you? |  |  |
| 29. | 问到剧本中没有提及的疾病症状是否有异常？  Are there any abnormal symptoms not mentioned in the script? |  |  |
| 30. | 问到剧本没有提及的不是与疾病相关的问题?  Questions not related to illness that are not mentioned in the script |  |  |
| 31. | 请文字记录医生问及的其他问题  Please provide a written record of the other questions the doctor asked. | 请文字记录患者对该问题的回答  Please provide a written record of the patient's answers to these questions. |  |
| 31-1 |  |  |  |
| 31-2 |  |  |  |
| 31-3 |  |  |  |
| 31-4 |  |  |  |
| 31-5 |  |  |  |
| … | …… | …… | …… |
| 既往史  Past medical history | | | |
| 32. | 以前有其他疾病吗？  Have you had any other illnesses in the past? |  |  |
| 33. | 是否按照计划进行免疫接种？  Have you been following the recommended immunizations? |  |  |
| 34. | 在你小时候是不是就有呼吸上的毛病？是否有心脏病？  Did you have breathing problems when you were a child? Did you have heart disease? |  |  |
| 过敏史  Allergy history | | | |
| 35. | 过敏性鼻炎严重吗？  Is your allergic rhinitis severe? |  |  |
| 36. | 做过过敏原试验吗？  Have you had allergy testing done? |  |  |
| 37. | 对其他东西过敏吗？  Are you allergic to anything else? |  |  |
| 个人史：包括生活习惯，家庭、婚姻  Personal History: Including lifestyle habits, family, and marital status | | | |
| 38. | 你有什么特殊的个人习惯吗？比如抽烟、喝酒？  Do you have any particular personal habits? Like smoking or drinking? |  |  |
| 39. | 结婚了吗？  Are you married? |  |  |
| 40. | 家庭和睦吗？  Is your family harmonious? |  |  |
| 41. | 居住情况：独居？与配偶居住？  Living Arrangements: Living alone? Living with spouse? |  |  |
| 42. | 家庭总人口数：  Total household population: |  |  |
| 43. | 是否有子女：若有，有几个？子女是否同住等。  Do you have children? If so, how many? Do they live with you? |  |  |
| 44. | 配偶基本情况  Basic Information of Spouse |  |  |
| 45. | 婚姻状况怎么样？  What is your marital status? |  |  |
| 家族史  Family History | | | |
| 46. | 你的父母健在吗？  Are your parents still alive? |  |  |
| 47. | 家里人有和你情况相似的吗？  Does anyone in your family have a similar situation? |  |  |
| 48. | 你妈妈是什么时候有过敏性鼻炎的？  When did your mother first develop allergic rhinitis? |  |  |
| 49. | 除了你妈妈，家里其他人还有这个毛病吗？  Does anyone else in your family have this problem besides your mom? |  |  |
| 50. | 她症状严重吗？  Are her symptoms severe? |  |  |
| 个人信息  Personal Information | | | |
| 51. | 年龄  Age |  |  |
| 52. | 教育程度  Educational background |  |  |
| 53. | 职业  Occupation |  |  |
| 54. | 是否有医保  Do you have health insurance? |  |  |
| 55. | 家庭经济状况  Family economic status |  |  |
| 56. | 在家时喜欢做些什么？  What do you like to do at home? |  |  |
| 57. | 是本地人吗？  Are you a local? |  |  |
| 58. | 家是哪里的？  Where is your home? |  |  |

| *Panel B Script for unstable angina* |
| --- |
| Name, gender, age, sales  Reason for visit: chest pain  State of consultation: a little sluggish, with chest pain  Main complaint: intermittent chest pain for 1 year, worsening in the last 1 week  1. Name, gender, xx years old, November 15, 19xx, lives in XXX Street, XX District, and his phone number is XXXXXXXXXXX.  2. Daily life is irregular, eating and sleeping are not punctual. When busy, there is no time to eat and sleep for a few hours. I usually like to smoke, one pack of cigarettes a day for 8 years. I like to drink when I go out to eat with my friends and have drunk it for 5 years (the above symptoms are the description of SP for boys, if SP is for girls, they don't smoke, but they often drink because of the nature of work).  3. Gradually, I feel a little overwhelmed by my body. A year ago, I occasionally experienced chest pains when I was working and angry, about once a month or two, but after resting for about three to five minutes, the pain gradually disappeared.  4. But the pain occurred once every four days last Wednesday, and it also occurred during rest. When it hurts, I feel dizzy, sweating, fatigued, and short of breath. Now it takes 20 minutes to gradually relieve the pain. Just two days ago, when I was resting, he had chest tightness and severe chest pain. Because the pain was so severe this time, I was going to see the doctor.  5. Except that blood sugar is a bit high, the body has no other diseases. Usually, my taste is heavier when eating food, and I eat more salt.  6. My elder brother had similar symptoms. The rest of the family is healthy. |

| **心绞痛**  **Unstable angina** | | | |
| --- | --- | --- | --- |
| **问题**  **Question** | | **医生是否问了以下问题1=是（跳到下一行）2=否 Did the doctor ask the following questions? 1 = Yes (Proceed to the next line)**  **2 = No** | **如果没有，你是否告诉了医生这一问题的答案中提供的信息（1=是 2=否）If not, did you provide the information from the answer to this question to the doctor?**  **(1 = Yes, 2 = No)** |
| 现病史  Current Medical History | | | |
| 1. | 疼痛位置  Location of the pain |  |  |
| 2. | 疼痛的类型（闷着疼/隐痛，针刺痛）  Type of pain (dull/hidden pain, stabbing pain) |  |  |
| 3. | 什么的时候开始疼的  When did the pain start? |  |  |
| 4. | 每次疼多长时间（发作频率）  How long does each pain episode last? (Frequency of occurrence) |  |  |
| 5. | 疼痛程度  Severity of the pain |  |  |
| 6. | 胸疼的时候吸气或呼气时疼痛感觉会变化吗？  Does the sensation of pain change when inhaling or exhaling during chest pain? |  |  |
| 7. | 还有别的地方也疼吗？  Do you feel pain anywhere else? |  |  |
| 8. | 左胳膊是怎么痛的？  What kind of pain is in your left arm? |  |  |
| 9. | 有没有后背疼？  Is there any back pain? |  |  |
| 10. | 每次痛的时候会持续多长时间啊？你怎么缓解的？  How long does the pain last each time? How do you manage it? |  |  |
| 11. | 现在多长时间痛一次？  How often do you experience pain now? |  |  |
| 12. | 痛的时候你在做什么？有原因吗？  What were you doing when the pain started? Was there a reason? |  |  |
| 13. | 吃药了吗  Did you take any medication? |  |  |
| 14. | 心慌  Palpitations |  |  |
| 15. | 气短  Shortness of breath |  |  |
| 16. | 恶心、呕吐  Nausea, vomiting |  |  |
| 17. | 身体出虚汗（多汗）  Excessive sweating (profuse sweating) |  |  |
| 18. | 身体乏力  Weakness in the body |  |  |
| 19. | 以前身体乏力  Weakness in the body in the past |  |  |
| 20. | 感觉到头晕  Feeling dizzy |  |  |
| 21. | 以前感到头晕吗？  Did you feel dizzy in the past? |  |  |
| 22. | 你有没有感觉到便秘、腹泻、腹胀腹痛、嘴里酸（反酸）的感觉？  Have you experienced constipation, diarrhea, bloating and abdominal pain, or a sour taste in your mouth (acid reflux)? |  |  |
| 23. | 有没有发热、咳嗽、咯血？  Do you have a fever, cough, or hemoptysis? |  |  |
| 24. | 你平常吃肉多还是吃素多？  Do you usually eat more meat or more vegetables? |  |  |
| 25. | 吃盐重不重  Do you consume a lot of salt? |  |  |
| 26. | 之前有没有类似的疼痛  Have you experienced similar pain before? |  |  |
| 27. | 之前是在什么情况下疼痛的？  Under what circumstances did you experience pain previously? |  |  |
| 28. | 那是（以前）什么情况下会痛？  What circumstances used to cause that pain? |  |  |
| 29. | 有胸痛的情况到现在一共有多久了？  How long have you been experiencing chest pain? |  |  |
| 30. | 以前多长时间痛一次？  How often did the pain occur before? |  |  |
| 31. | 之前痛的时候和现在的情况一样吗？  Is the pain the same as before? |  |  |
| 32. | 从什么时候开始有这种疼痛症状的  Since when have you been experiencing these pain symptoms? |  |  |
| 33. | 现在多长时间疼一次？  How frequently are you experiencing the pain now? |  |  |
| 34. | 疼痛是否因为你的一些行为加重或缓解？  Does the pain worsen or alleviate due to certain actions of yours? |  |  |
| 35. | 疼痛变化吗？会不会因为什么事而加重？  Does the pain change? Does it worsen due to anything in particular? |  |  |
| 36. | 以前多长时间疼一次？  How frequently did the pain occur in the past? |  |  |
| 37. | 以前疼的时候怎么办？  What did you do when you experienced pain in the past? |  |  |
| 38. | 以前胸痛的部位与最近胸痛部位、范围是一样的吗？  Is the location and extent of the recent chest pain the same as the previous episodes? |  |  |
| 39. | 以前痛的时候持续时间多长啊？你怎么办？  How long did the pain last before? What did you do about it? |  |  |
| 40. | 这段时间，饮食、大小便有什么变化吗？  Have there been any changes in your diet or bowel movements during this period? |  |  |
| 41. | 这段时间，睡眠有什么变化吗？  Have you noticed any changes in your sleep lately? |  |  |
| 42. | 这段时间，体重有什么变化吗？  Have you noticed any changes in your weight lately? |  |  |
| 43. | 你以前胸痛去医院看过没？  Have you ever been to the hospital for chest pain before? |  |  |
| 系统回顾  System Review | | | |
| 44. | 其它还有什么地方不舒服？  Is there anywhere else that's bothering you? |  |  |
| 45. | 问到剧本中没有提及的疾病症状是否有异常？  Are there any abnormal symptoms not mentioned in the script? |  |  |
| 46. | 问到剧本没有提及的不是与疾病相关的问题?  Questions not related to illness that are not mentioned in the script |  |  |
| 47. | 请文字记录医生问及的其他问题  Please provide a written record of the other questions the doctor asked. | 请文字记录患者对该问题的回答  Please provide a written record of the patient's answers to these questions. |  |
| 47-1 |  |  |  |
| 47-2 |  |  |  |
| 47-3 |  |  |  |
| 47-4 |  |  |  |
| 47-5 |  |  |  |
| … | …… | …… | …… |
| 既往史  Past medical history | | | |
| 48. | 你以前有没有患过什么疾病？ 有没有糖尿病？  Have you ever had any illnesses before? Do you have diabetes? |  |  |
| 49. | 血糖高不高  Is your blood sugar high? |  |  |
| 50. | 血糖高是什么时候开始的  When did high blood sugar start? |  |  |
| 51. | 有没有吃降糖药  Are you taking medication to lower blood sugar? |  |  |
| 52. | 吃的什么降糖药  What medication are you taking to lower blood sugar? |  |  |
| 53. | 降糖药是什么样子的  What do blood sugar-lowering medications look like? |  |  |
| 54. | 吃了多久的降糖药  How long have you been taking blood sugar-lowering medication? |  |  |
| 55. | 血压高不高  Is your blood pressure high? |  |  |
| 56. | 血脂高不高  Are your blood lipid levels high? |  |  |
| 57. | 什么时候查的血脂  When did you have your blood lipids checked? |  |  |
| 58. | 还有没有其他症状？  Are there any other symptoms? |  |  |
| 59. | 有受过外伤、做过手术吗？  Have you ever had any injuries or surgeries? |  |  |
| 过敏史  Allergy history | | | |
| 60. | 对什么药物或食物过敏？  What medications or foods are you allergic to? |  |  |
| 个人史：包括生活习惯，家庭、婚姻  Personal History: Including lifestyle habits, family, and marital status | | | |
| 61. | 是否抽烟  Do you smoke? |  |  |
| 62. | 是否喝酒  Do you drink alcohol? |  |  |
| 63. | 家庭和睦吗？  Are you in good relationship with your families? |  |  |
| 64. | 和家里人住一起吗？  Do you live with your families? |  |  |
| 65. | 几口人？  How many people do you have in the household? |  |  |
| 66. | 有子女吗？  Do you have children? |  |  |
| 67. | 爱人的工作？  What is your partner’s job? |  |  |
| 家族史  Family History | | | |
| 68. | 父母健在吗？ |  |  |
| 69. | 你的兄弟、姐妹、父母是否有类似疾病  Do your siblings, parents, or other family members have similar medical conditions? |  |  |
| 个人信息  Personal Information | | | |
| 70. | 年龄  Age |  |  |
| 71. | 教育程度  Educational background |  |  |
| 72. | 职业  Occupation |  |  |
| 73. | 是否有医保  Do you have health insurance? |  |  |
| 74. | 家庭经济状况  Family economic status |  |  |
| 75. | 在家时的主要活动：根据患者的性别设定广场舞？带小孩？家务？  Primary activities at home: Square dancing based on the patient's gender? Taking care of children? Household chores? |  |  |
| 76. | 是本地人吗？  Are you a local? |  |  |
| 77. | 家是哪里的？  Where is your home? |  |  |

# Supplementary 2. Checklist, diagnosis and treatment

| **Checklist items for asthma** | |  |  |
| --- | --- | --- | --- |
| **Panel A Checklist item** | |  |  |
| **Item order** | **Item** | **Recommend item** | **Essential item** |
|  |  | **(N=11)** | **(N=6)** |
| 1 | Cough with Phlegm (Throat) | 1 | 0 |
| 2 | Nocturnal Wheezing [Essential] | 1 | 1 |
| 3 | Severity [Essential] | 1 | 1 |
| 4 | Progression of the Condition [Essential] | 1 | 1 |
| 5 | Methods of Relief [Essential] | 1 | 1 |
| 6 | Duration of the Episode [Essential] | 1 | 1 |
| 7 | Triggers of the Episode [Essential] | 1 | 1 |
| 8 | Presence of Chest Pain | 1 | 0 |
| 9 | Childhood (Infancy) Medical History | 1 | 0 |
| 10 | Other Diseases | 1 | 0 |
| 11 | Family Medical History | 1 | 0 |
| **Panel B Medical test items** | |  |  |
| **Item order** | **Item** | **Recommend item** | **Essential item** |
|  |  | **(N=8)** | **(N=2)** |
| 1 | Auscultation of the Chest or Back [Essential] | 1 | 1 |
| 2 | Blood Pressure | 1 | 0 |
| 3 | Chest X-ray | 1 | 0 |
| 4 | Pulmonary Ventilation Function Test [Essential] | 1 | 1 |
| 5 | Electrocardiogram or Cardiac Ultrasound | 1 | 0 |
| 6 | Oxygen Saturation | 1 | 0 |
| 7 | Heart Rate | 1 | 0 |
| 8 | Respiratory Rate | 1 | 0 |

| **Checklist items for angina** | |  |  |
| --- | --- | --- | --- |
| **Panel A Checklist item** | |  |  |
| **Item order** | **Item** | **Recommend item** | **Essential item** |
|  |  | **(N=31)** | **(N=6)** |
| 1 | Age | 1 | 0 |
| 2 | Trigger (What Triggers the Onset of Pain) [Essential] | 1 | 1 |
| 3 | Location [Essential] | 1 | 1 |
| 4 | Time of Most Recent Episode | 1 | 0 |
| 5 | Type of pain [Essential] | 1 | 1 |
| 6 | Previous Similar Pain | 1 | 0 |
| 7 | Duration of Pain [Essential] | 1 | 1 |
| 8 | Extent of pain [Essential] | 1 | 1 |
| 9 | Daily Activity Capacity | 1 | 0 |
| 10 | Pain Change During Respiration | 1 | 0 |
| 11 | Onset Time (Earliest Onset Time) | 1 | 0 |
| 12 | Shortness of Breath | 1 | 0 |
| 13 | Radiating pain [Essential] | 1 | 1 |
| 14 | Nausea and Vomiting | 1 | 0 |
| 15 | Diarrhea | 1 | 0 |
| 16 | Stool Condition | 1 | 0 |
| 17 | Acid Reflux | 1 | 0 |
| 18 | Sweating | 1 | 0 |
| 19 | Abdominal Pain | 1 | 0 |
| 20 | Past Medical History | 1 | 0 |
| 21 | Trauma or Surgery History | 1 | 0 |
| 22 | Drug or Food Allergy | 1 | 0 |
| 23 | Occupation | 1 | 0 |
| 24 | Smoking Status | 1 | 0 |
| 25 | Drinking Status | 1 | 0 |
| 26 | Family Medical History | 1 | 0 |
| 27 | Peptic Ulcer History | 1 | 0 |
| 28 | Respiratory Disease History | 1 | 0 |
| 29 | Blood Sugar | 1 | 0 |
| 30 | Blood Pressure | 1 | 0 |
| 31 | Blood Lipids | 1 | 0 |
| **Panel B Medical test items** | |  |  |
| **Item order** | **Item** | **Recommend item** | **Essential item** |
|  |  | **(N=5)** | **(N=1)** |
| 1 | Auscultation | 1 | 0 |
| 2 | Pulse | 1 | 0 |
| 3 | Blood pressure | 1 | 0 |
| 4 | Electrocardiogram [Essential] | 1 | 1 |
| 5 | Myocardial Enzyme Markers | 1 | 0 |

|  | **Unstable angina** | **Asthma** |
| --- | --- | --- |
| **Diagnosis** | 1. Correct diagnosis  Angina  2. Incorrect diagnosis  Myocardial ischemia, neuralgia, menopausal syndrome, myocarditis,  cervical spondylosis, chest congestion, swelling in chest. | 1. Correct diagnosis  Asthma  2. Incorrect diagnosis  Heart disease, cold, coronary heart disease, respiratory infection, myocardial ischemia, acute pharyngitis, mycoplasma infection. |
| **Treatment** | 1. Correct treatment  Aspirin, clopidogrel/ or other anti‐platelet agents, referral.  2. Unnecessary or harmful, for example  Antibiotics, ginkgo oral liquid, Naoxintong capsule, oral electrolyte solution, psychiatric medication, theophylline | 1. Correct treatment  Bronchodilators, theophylline, inhaled or oral corticosteroids, leukotriene inhibitors, inhaled anticholinergic  2. Unnecessary or harmful, for example  Aspirin, compound liquorice tablet, erythromycin, lung-nourishing semifluid extract, ginkgo oral liquid, cephalosporin |

# Figure S1. The distribution of each specific item in the angina and asthma checklist

**PHC physician**

**ChatGPT-4o**

**DeepSeek R1**

**(2) Asthma**

**PHC physician**

**ChatGPT-4o**

**DeepSeek R1**

**(1) Angina**

Note: * means the essential checklist

# Table S1. Sensitivity analysis for diagnostic accuracy

| Variables | Correct diagnosis | |  | Correct medication | |
| --- | --- | --- | --- | --- | --- |
| All diagnosis  If any correct | First diagnosis  If correct |  | All medication  If any correct | First medication  If correct |
| **Overall** |  |  |  |  |  |
| PHC physicians | 0.306(0.249,0.364) | 0.306(0.249,0.364) |  | 0.354(0.234,0.473) | 0.231(0.126,0.336) |
| DeepSeek R1 | 0.992(0.971,0.998) | 0.875(0.834,0.916) |  | 1.000(1.000,1.000) | 0.996(0.978,0.999) |
| ChatGPT-4o | 0.940(0.910,0.969) | 0.762(0.709,0.815) |  | 1.000(1.000,1.000) | 0.988(0.965,0.996) |
| **Angina** |  |  |  |  |  |
| PHC physicians | 0.565(0.476,0.653) | 0.565(0.476,0.653) |  | 0.417(0.204,0.639) | 0.333(0.130,0.537) |
| DeepSeek R1 | 1.000(1.000,1.000) | 0.782(0.709,0.856) |  | 1.000(1.000,1.000) | 1.000(1.000,1.000) |
| ChatGPT-4o | 1.000(1.000,1.000) | 0.806(0.736,0.877) |  | 1.000(1.000,1.000) | 0.992(0.956,0.999) |
| **Asthma** |  |  |  |  |  |
| PHC physicians | 0.048(0.010,0.087) | 0.048(0.010,0.087) |  | 0.317(0.168,0.466) | 0.171(0.050,0.291) |
| DeepSeek R1 | 0.984(0.943,0.996) | 0.968(0.936,0.999) |  | 1.000(1.000,1.000) | 0.992(0.956,0.999) |
| ChatGPT-4o | 0.897(0.820,0.937) | 0.718(0.637,0.798) |  | 1.000(1.000,1.000) | 0.984(0.943,0.996) |

Note: Mean (95% CI)

# Table S2. Sensitivity Analysis of Reversing the Order of Physician and AI Consultations

| Variables | **ChatGPT 4o**  (ref: PHC physicians) | | | **DeepSeek R1**  (ref: PHC physicians) | | | **DeepSeek R1**  (ref: ChatGPT 4o) | | |
| --- | --- | --- | --- | --- | --- | --- | --- | --- | --- |
| dy/dx | 95% CI | *P* | dy/dx | 95% CI | *P* | dy/dx | 95% CI | *P* |
| **Quality indicators** |  |  |  |  |  |  |  |  |  |
| Full checklists (%) | 0.156 | 0.138,0.173 | <0.001 | 0.223 | 0.205,0.242 | <0.001 | 0.065 | 0.053,0.077 | <0.001 |
| Essential checklists (%) | 0.135 | 0.102,0.167 | <0.001 | 0.214 | 0.183,0.245 | <0.001 | 0.076 | 0.055,0.098 | <0.001 |
| Correct diagnosis (0/1) | 0.485 | 0.435,0.534 | <0.001 | 0.485 | 0.420,0.549 | <0.001 | 0.222 | 0.104,0.339 | <0.001 |
| Correct medication (0/1) | 0.689 | 0.548,0.830 | <0.001 | 0.689 | 0.548,0.830 | <0.001 | 0.000 | 0.000,0.000 | 1.000 |
| **Safety indicators** |  |  |  |  |  |  |  |  |  |
| No. of tests requested | 1.290 | 1.038,1.542 | <0.001 | 2.565 | 2.265,2.865 | <0.001 | 1.268 | 1.015,1.522 | <0.001 |
| Unnecessary test requested (0/1) | 0.434 | 0.407,0.460 | <0.001 | 0.477 | 0.448,0.507 | <0.001 | 0.091 | 0.335,0.149 | 0.002 |
| No. of medication prescribed | 7.566 | 6.680,8.453 | <0.001 | 7.567 | 6.724,8.410 | <0.001 | 0.294 | 0.086,0.502 | 0.006 |
| Inappropriate medication prescribed (0/1) | 0.466 | 0.424,0.504 | <0.001 | 0.388 | 0.325,0.451 | <0.001 | -0.134 | -0.218,-0.050 | 0.002 |
| **PPPC-CN** |  |  |  |  |  |  |  |  |  |
| Total score (range 1–4) | 0.728 | 0.658,0.799 | <0.001 | 0.816 | 0.744,0.887 | <0.001 | 0.081 | 0.046,0.118 | <0.001 |
| C1: Exploring health, disease and the illness experience | 0.501 | 0.433,0.570 | <0.001 | 0.565 | 0.496,0.634 | <0.001 | 0.062 | 0.029,0.096 | <0.001 |
| C2: Finding the common ground | 0.798 | 0.718,0.879 | <0.001 | 0.913 | 0.830,0.996 | <0.001 | 0.111 | 0.066,0.156 | <0.001 |
| C3: Understanding the whole person | 0.855 | 0.772,0.938 | <0.001 | 0.936 | 0.854,1.018 | <0.001 | 0.070 | 0.015,0.124 | 0.012 |
| C4: Enhancing the patient-clinician relationship | 0.636 | 0.545,0.727 | <0.001 | 0.702 | 0.611,0.793 | <0.001 | 0.049 | -0.008,0.099 | 0.054 |

Note: To assess the robustness of our findings, we conducted a sensitivity analysis (N=620) by removing the earliest consultation record for each standardized patient (SP) on a given day conducted by primary healthcare (PHC) physicians, and the latest consultation record for each SP on a given day conducted by AI chatbots. The remaining sample was used for all analyses presented in this table.

# Table S3. Comparison of PHC physicians in Henan province and China nationwide

| **Variables** | Henan province  (n=248) | | China nationwide  (n=393) | | t/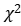 | *P* |
| --- | --- | --- | --- | --- | --- | --- |
| Mean | 95%CI | Mean | 95%CI |
| **Quality indicators** | | | | | | |
| % Completion of the full checklists | 0.259 | 0.243,0.274 | 0.217 | 0.013,0.198 | 16.140 | <0.001 |
| % Completion of the essential checklists | 0.405 | 0.368,0.441 | 0.282 | 0.012,0.264 | 42.930 | <0.001 |
| % Correct diagnosis | 0.306 | 0.249,0.364 | 0.193 | 0.021,0.151 | 10.745 | 0.001 |
| % Correct medication | 0.354 | 0.234,0.473 | 0.370 | 0.288,0.451 | 0.047 | 0.828 |
| **Safety indicators** |  |  |  |  |  |  |
| No. of tests requested | 2.492 | 2.310,2.673 | 1.051 | 0.937,1.165 | 194.950 | <0.001 |
| % Unnecessary test requested | 0.331 | 0.272,0.390 | 0.061 | 0.037,0.085 | 80.058 | <0.001 |
| No. of medication prescribed | 0.657 | 0.494,0.821 | 0.835 | 0.691,0.978 | 2.450 | 0.118 |
| % Inappropriate medication prescribed | 0.234 | 0.181,0.287 | 0.313 | 0.267,0.359 | 4.696 | 0.030 |
| **PPPC-CN** |  |  |  |  |  |  |
| Total score | 2.548 | 2.474,2.622 | 2.666 | 2.612, 2.720 | 6.630 | 0.010 |
| Exploring health, disease and the illness experience | 3.006 | 2.924,3.088 | 3.017 | 2.957,3.077 | 0.050 | 0.828 |
| Finding common ground | 2.307 | 2.231,2.382 | 2.562 | 2.502,2.621 | 27.350 | <0.001 |
| Understanding the whole person | 2.374 | 2.291,2.457 | 2.527 | 2.468,2.586 | 9.240 | 0.003 |
| Enhancing the patient-clinician relationship | 2.871 | 2.775,2.967 | 2.728 | 2.670,2.787 | 7.020 | 0.008 |

# Supplement 3. An example of AI medical consultation

**心绞痛 Angina**

ID: 20642

Investigator: Zhang Kaiyi

Location: Taichen Town, Linying County, Luohe City, Henan Province

PPPC Score: 4/4

**Standardized Patient**：医生，我感觉胸口疼，最近 1 周疼得很厉害。我是男的，今年 58 岁。

**Standardized Patient**: Doctor, I've been having chest pain, and it's gotten really bad in the past week. I'm a 58-year-old man.

**DeepSeek**：感谢您提供的信息。为了更准确地了解您的病情，我需要进一步询问一些细节问题。请您耐心回答：

1. **疼痛的具体位置**：胸痛是位于左侧、右侧还是正中间？是否向其他部位（如肩膀、背部、手臂或下颌）放射？
2. **疼痛的性质**：是钝痛、刺痛、压迫感还是烧灼感？疼痛是持续性的还是间歇性的？
3. **疼痛的持续时间**：每次疼痛持续多久？是突然发作的还是逐渐加重的？
4. **诱发或缓解因素**：是否有活动（如运动、用力）、情绪波动、饮食或体位改变时疼痛加重？休息或服用药物后是否缓解？
5. **伴随症状**：是否有以下症状？
   - - 呼吸困难
     - 心悸（心跳加快或不规则）
     - 头晕或晕厥
     - 出汗（尤其是冷汗）
     - 恶心或呕吐
     - 咳嗽或咳血
6. **既往病史：**是否有高血压、糖尿病、高血脂、心脏病或其他慢性疾病？
7. **家族史：**家族中是否有心脏病、中风或其他心血管疾病的病史？
8. **生活习惯：**是否有吸烟、饮酒、缺乏运动或高脂饮食的习惯？

请尽量详细描述，这将帮助我更好地判断您的病情并提供合适的建议。

**DeepSeek**: Thank you for the information. To better understand your condition, I need to ask some detailed follow-up questions. Please answer patiently:

1. **Exact location of pain**: Is the chest pain on the left, right, or center? Does it radiate to other areas (e.g., shoulder, back, arm, or jaw)?
2. **Nature of pain**: Is it dull, sharp, oppressive, or burning? Is the pain constant or intermittent?
3. **Duration of pain**: How long does each episode last? Does it start suddenly or worsen gradually?
4. **Triggering or relieving factors**: Does the pain worsen with activity (e.g., exercise, exertion), emotional stress, eating, or position changes? Does it improve with rest or medication?
5. **Accompanying symptoms**: Do you have any of the following?
   - - Shortness of breath
     - Palpitations (rapid or irregular heartbeat)
     - Dizziness or fainting
     - Sweating (especially cold sweats)
     - Nausea or vomiting
     - Cough or hemoptysis
6. **Past medical history**: Do you have hypertension, diabetes, hyperlipidemia, heart disease, or other chronic conditions?
7. **Family history**: Is there a history of heart disease, stroke, or other cardiovascular diseases in your family?
8. **Lifestyle habits**: Do you smoke, drink alcohol, lack exercise, or follow a high-fat diet?

Please describe as detailed as possible—this will help me better assess your condition and provide appropriate advice.

**Standardized Patient**：左胸部疼，有时候左胳膊也疼，疼痛的像有重东西压着一样，疼是间歇性的，每次疼 20 分钟，每次都是没在做什么事，突然就开始疼了，不清楚是否与活动有关。疼的时候气短、出汗、头晕、心悸，但不恶心呕吐、咳嗽咳血。以前血糖高过，其他病不清楚。我大哥也有类似症状，医生说冠心病。抽烟一天 20 支，喝酒一周一次，一次两杯，有 5 年了。饮食运动不清楚。

**Standardized Patient**: The pain is in the left chest, and sometimes my left arm hurts too—it feels like something heavy is pressing down. It's intermittent, lasting 20 minutes each time. It starts suddenly when I'm not doing anything; I don't know if it's related to activity. When it hurts, I have shortness of breath, sweating, dizziness, and palpitations, but no nausea, vomiting, cough, or hemoptysis. My blood sugar was high before; I don't know about other conditions. My older brother had similar symptoms, and the doctor said he has coronary heart disease. I smoke 20 cigarettes a day, and I've been drinking two drinks once a week for 5 years. I don't know about my diet or exercise habits.

**DeepSeek**：根据您的描述，您的症状（左胸部压迫性疼痛、放射至左臂、伴随气短、出汗、头晕和心悸）以及危险因素（年龄、吸烟、饮酒、高血糖史、家族冠心病史）高度提示可能存在**冠心病**，尤其是**心绞痛**或**心肌缺血**的可能性较大。这种疼痛通常由心脏供血不足引起，可能进一步发展成心肌梗死，需要高度重视。

1. **初步诊断：**
2. **冠心病（心绞痛）**：您的症状（胸痛、放射痛、伴随症状）和危险因素（吸烟、高血糖、家族史）均支持这一诊断。
3. **其他可能性**：需排除胃食管反流病、肋间神经痛、胸壁肌肉疼痛等，但您的症状更倾向于心脏问题。
4. **建议的下一步检查：**
5. **心电图（ECG）**：评估是否存在心肌缺血或心律失常。
6. **心肌酶谱**：排除心肌梗死的可能性。
7. **心脏超声**：评估心脏结构和功能。
8. **冠状动脉造影**：确诊冠心病并评估血管狭窄程度。
9. **血糖、血脂、血压检查**：评估心血管危险因素。
10. **初步治疗建议：**
11. **立即就医**：您的症状提示可能存在严重的心脏问题，建议尽快前往医院急诊或心内科就诊，进一步明确诊断。
12. **药物治疗（需医生确认后使用）**：
    - - **硝酸甘油**：胸痛发作时可舌下含服一片（0.5 mg），5 分钟后若无缓解可重复一次。若连续 3 次无效，需立即就医。
      - **阿司匹林**：若无禁忌症（如胃溃疡、过敏），可嚼服 300 mg 阿司匹林以预防血栓形成。
      - **他汀类药物**：如阿托伐他汀（20-40 mg / 天），用于降低血脂、稳定斑块。
      - **β 受体阻滞剂**：如美托洛尔（25-50 mg / 天），用于降低心率和心肌耗氧量。
      - **ACEI/ARB 类药物**：如雷米普利（2.5-5 mg / 天），用于保护心脏功能。
13. **生活方式调整：**
    - - **戒烟：**吸烟是冠心病的重要危险因素，建议立即戒烟。
      - **限酒：**减少酒精摄入，建议每周不超过 1-2 杯。
      - **饮食控制：**低盐、低脂、低糖饮食，增加蔬菜、水果和全谷类摄入。
      - **适量运动：**在医生指导下进行适度的有氧运动（如步行、游泳）。
      - **控制血糖：**定期监测血糖，必要时使用药物控制。
14. **注意事项：**
    - - 如果胸痛持续超过 20 分钟或加重，伴随大汗、呼吸困难、意识模糊等症状，请立即拨打急救电话（如 120），可能是心肌梗死。
      - 不要自行诊断或随意用药，所有药物需在医生指导下使用。

请尽快就医，明确诊断并接受规范治疗。祝您早日康复！

**DeepSeek**: Based on your description, your symptoms (oppressive left chest pain radiating to the left arm, accompanied by shortness of breath, sweating, dizziness, and palpitations) and risk factors (age, smoking, alcohol consumption, past high blood sugar, family history of coronary heart disease) strongly suggest **coronary artery disease (CAD)**, particularly **angina pectoris** or **myocardial ischemia**. This pain is usually caused by insufficient blood supply to the heart and could progress to a myocardial infarction, so it requires serious attention.

1. **Preliminary Diagnosis:**
2. **Coronary artery disease (angina pectoris):** Your symptoms (chest pain, radiating pain, accompanying symptoms) and risk factors (smoking, high blood sugar, family history) support this diagnosis.
3. **Other possibilities**: Gastroesophageal reflux disease, intercostal neuralgia, or chest wall muscle pain need to be ruled out, but your symptoms are more consistent with a cardiac issue.
4. **Recommended Next Steps for Testing:**
5. **Electrocardiogram (ECG)**: Evaluate for myocardial ischemia or arrhythmia.
6. **Cardiac enzyme panel**: Rule out myocardial infarction.
7. **Echocardiogram**: Assess cardiac structure and function.
8. **Coronary angiography:** Confirm CAD and evaluate the degree of vascular stenosis.
9. **Blood glucose, lipid, and blood pressure tests**: Assess cardiovascular risk factors.
10. **Preliminary Treatment Recommendations:**
    - 1. **Seek medical attention immediately**: Your symptoms suggest a potential serious cardiac issue—please go to the hospital emergency department or cardiology clinic as soon as possible for a definitive diagnosis.
      2. **Medication (to be used only after doctor confirmation)**:
         - **Nitroglycerin**: Sublingually administer 1 tablet (0.5 mg) when chest pain occurs; repeat after 5 minutes if no relief. If no improvement after 3 consecutive doses, seek emergency care immediately.
         - **Aspirin**: If no contraindications (e.g., gastric ulcer, allergy), chew 300 mg of aspirin to prevent thrombosis.
         - **Statin**: e.g., Atorvastatin (20-40 mg/day) to lower lipids and stabilize plaques.
         - **Beta-blocker**: e.g., Metoprolol (25-50 mg/day) to reduce heart rate and myocardial oxygen consumption.
         - **ACEI/ARB**: e.g., Ramipril (2.5-5 mg/day) to protect cardiac function.
      3. **Lifestyle modifications:**
         - **Quit smoking**: Smoking is a major risk factor for CAD—quit immediately.
         - **Limit alcohol**: Reduce alcohol intake; no more than 1-2 drinks per week.
         - **Diet control**: Low-salt, low-fat, low-sugar diet; increase intake of vegetables, fruits, and whole grains.
         - **Moderate exercise**: Under doctor supervision, engage in moderate aerobic exercise (e.g., walking, swimming).
         - **Control blood sugar**: Monitor blood sugar regularly; use medication if necessary.
      4. **Precautions:**
         - If chest pain lasts more than 20 minutes or worsens, accompanied by heavy sweating, shortness of breath, confusion, etc., call emergency services (e.g., 120) immediately—it may be a myocardial infarction.
         - Do not self-diagnose or take medications arbitrarily; all medications must be used under a doctor's guidance.

Please seek medical care promptly for a definitive diagnosis and standardized treatment. Wishing you a speedy recovery!

**Standardized Patient**：请给出药物建议。

**Standardized Patient**: Please provide medication recommendations.

**DeepSeek**：在您的症状和病史基础上，以下是一些常用的药物建议，但请注意，这些药物需在医生明确诊断后使用，切勿自行用药。以下建议仅供参考：

**DeepSeek**: Based on your symptoms and medical history, here are some common medication recommendations. Note that these should only be used after a doctor’s definitive diagnosis—do not self-medicate. This is for reference only:

**1. 急性发作时的药物：**

- 1. **硝酸甘油（Nitroglycerin）**：
  2. 用法：胸痛发作时舌下含服 1 片（0.5 mg），5 分钟后若无缓解可重复一次。若连续 3 次无效，需立即就医。
  3. 作用：扩张冠状动脉，缓解心绞痛。
  4. 注意：低血压患者慎用。
  5. **阿司匹林（Aspirin）**：
     - 用法：胸痛发作时嚼服 300 mg（非肠溶片）。
     - 作用：抗血小板聚集，预防血栓形成。
     - 注意：胃溃疡或阿司匹林过敏者禁用。

**1. Medications for Acute Episodes**:

- - - - **Nitroglycerin**:
        - Administration: Sublingually take 1 tablet (0.5 mg) when chest pain occurs; repeat after 5 minutes if no relief. If no improvement after 3 consecutive doses, seek emergency care immediately.
        - Effect: Dilates coronary arteries to relieve angina.
        - Caution: Use with caution in patients with hypotension.
      - **Aspirin**:
        - Administration: Chew 300 mg (non-enteric-coated tablet) when chest pain occurs.
        - Effect: Inhibits platelet aggregation to prevent thrombosis.
        - Caution: Contraindicated in patients with gastric ulcers or aspirin allergy.

**2. 长期治疗的药物：**

**（1）抗血小板药物：**

- 1. **阿司匹林（Aspirin）**：
     - 用法：每天口服 100 mg（肠溶片）。
     - 作用：预防血栓形成。
     - 注意：胃溃疡患者需联合使用胃保护药物（如奥美拉唑）。
  2. **氯吡格雷（Clopidogrel）**：
     - 用法：每天口服 75 mg。
     - 作用：与阿司匹林联合使用，用于高风险患者。

**（2）他汀类药物（降脂、稳定斑块）：**

- 1. **阿托伐他汀（Atorvastatin）**：
     - 用法：每天口服 20-40 mg，晚间服用。
     - 作用：降低血脂、稳定斑块，预防动脉粥样硬化进展。
     - 注意：定期监测肝功能。

**（3）β 受体阻滞剂（降低心率、心肌耗氧量）：**

- 1. **美托洛尔（Metoprolol）**：
     - 用法：每天口服 25-50 mg，分 1-2 次服用。
     - 作用：降低心率和血压，减少心肌耗氧量。
     - 注意：哮喘患者慎用。

**（4）ACEI/ARB 类药物（保护心脏功能）：**

- 1. **雷米普利（Ramipril）**：
     - 用法：每天口服 2.5-5 mg。
     - 作用：降低血压、改善心脏功能。
     - 注意：监测血钾和肾功能。
  2. **缬沙坦（Valsartan）**：
     - 用法：每天口服 80-160 mg。
     - 作用：替代 ACEI 类药物，用于不能耐受 ACEI 的患者。

**（5）硝酸酯类药物（预防心绞痛发作）：**

- 1. **单硝酸异山梨酯（Isosorbide Mononitrate）**：
     - 用法：每天口服 20-40 mg，分 1-2 次服用。
     - 作用：扩张血管，预防心绞痛发作。
     - 注意：避免与西地那非（伟哥）合用。

**2. Medications for Long-Term Treatment**:

**(1) Antiplatelet Agents:**

- - - - **Aspirin**:
        - Administration: Oral 100 mg (enteric-coated tablet) daily.
        - Effect: Prevents thrombosis.
        - Caution: Patients with gastric ulcers should combine with gastric protective agents (e.g., Omeprazole).
      - **Clopidogrel**:
        - Administration: Oral 75 mg daily.
        - Effect: Used in combination with aspirin for high-risk patients.

**(2) Statins (Lipid-Lowering, Plaque Stabilization):**

- - - - **Atorvastatin**:
        - Administration: Oral 20-40 mg daily, taken in the evening.
        - Effect: Lowers lipids, stabilizes plaques, and prevents progression of atherosclerosis.
        - Caution: Monitor liver function regularly.

**(3) Beta-Blockers (Reduce Heart Rate, Myocardial Oxygen Consumption):**

- - - - **Metoprolol**:
        - Administration: Oral 25-50 mg daily, divided into 1-2 doses.
        - Effect: Reduces heart rate and blood pressure, decreasing myocardial oxygen consumption.
        - Caution: Use with caution in patients with asthma.

**(4) ACEI/ARB (Protect Cardiac Function):**

- - - - **Ramipril**:
        - Administration: Oral 2.5-5 mg daily.
        - Effect: Lowers blood pressure and improves cardiac function.
        - Caution: Monitor blood potassium and renal function.
      - **Valsartan**:
        - Administration: Oral 80-160 mg daily.
        - Effect: Alternative to ACEI for patients intolerant to ACEI.

**(5) Nitrates (Prevent Angina Episodes):**

- - - - **Isosorbide Mononitrate**:
        - Administration: Oral 20-40 mg daily, divided into 1-2 doses.
        - Effect: Dilates blood vessels to prevent angina episodes.
        - Caution: Avoid concurrent use with sildenafil (Viagra).

**3. 针对高血糖的药物（如有需要）：**

- 1. **二甲双胍（Metformin）**：
     - 用法：每天口服 500-1000 mg，分 2 次服用。
     - 作用：控制血糖，改善胰岛素抵抗。
     - 注意：肾功能不全者慎用。

**3. Medications for High Blood Sugar (if needed)**:

- 1. **Metformin**:
     - Administration: Oral 500-1000 mg daily, divided into 2 doses.
     - Effect: Controls blood sugar and improves insulin resistance.
     - Caution: Use with caution in patients with renal insufficiency.

**重要提示：**

1. 以上药物需在医生指导下使用，切勿自行调整剂量或停药。
2. 如果出现药物不良反应（如皮疹、呼吸困难、严重胃肠道不适等），请立即停药并就医。
3. 定期复查心电图、血脂、血糖、肝肾功能等指标，监测药物疗效和安全性。

请尽快就医，明确诊断后制定个性化治疗方案。祝您早日康复！

**Important Reminders**:

1. The above medications must be used under a doctor’s guidance—do not adjust doses or discontinue medication without supervision.
2. If adverse reactions occur (e.g., rash, shortness of breath, severe gastrointestinal discomfort), stop medication immediately and seek medical care.
3. Regularly recheck ECG, lipids, blood sugar, liver/kidney function, etc., to monitor medication efficacy and safety.

Please seek medical care promptly to develop a personalized treatment plan after a definitive diagnosis. Wishing you a speedy recovery!
